# 1                   **Molecular programs of fibrotic change in aging human lung**

2   **Jasmine Lee<sup>1\*</sup>, Mohammad Naimul Islam<sup>2\*</sup>, Kaveh Boostanpour<sup>1</sup>, Dvir Aran<sup>3</sup>, Stephanie**  
3   **Christenson<sup>1</sup>, Michael A. Matthay<sup>1</sup>, Walter Eckalbar<sup>1</sup>, Daryle J. DePianto<sup>4</sup>, Joseph R.**  
4   **Arron<sup>4</sup>, Liam Magee<sup>1</sup>, Sunita Bhattacharya<sup>2,5</sup>, Rei Matsumoto<sup>6</sup>, Masaru Kubota<sup>6</sup>,**  
5   **Donna L. Farber<sup>6,7</sup>, Jahar Bhattacharya<sup>2\*</sup>, Paul J. Wolters<sup>1\*</sup>, Mallar Bhattacharya<sup>1\*</sup>**

6   <sup>1</sup> Department of Medicine, Division of Pulmonary, Critical Care, Allergy, and Sleep, University of  
7   California, San Francisco, CA, USA.

8   <sup>2</sup> Lung Biology Laboratory, Department of Medicine, Division of Pulmonary, Allergy, and Critical Care  
9   Medicine, Vagelos College of Physicians and Surgeons of Columbia University, New York, NY, USA.

10   <sup>3</sup> Lorry I. Lokey Interdisciplinary Center for Life Sciences & Engineering, Technion Israel Institute of  
11   Technology, Haifa, Israel.

12   <sup>4</sup> Genentech Research and Early Development, Genentech, Inc. South San Francisco, CA, USA.

13   <sup>5</sup> Department of Pediatrics, Vagelos College of Physicians and Surgeons of Columbia University, New  
14   York, NY, USA

15   <sup>6</sup> Department of Surgery, Vagelos College of Physicians and Surgeons of Columbia University, New  
16   York, NY, USA

17   <sup>7</sup> Department of Microbiology and Immunology, Columbia University, New York, NY, USA

18   \*Equal contribution. Correspondence: [mallar.bhattacharya@ucsf.edu](mailto:mallar.bhattacharya@ucsf.edu); [paul.wolters@ucsf.edu](mailto:paul.wolters@ucsf.edu);  
19   [jb39@columbia.edu](mailto:jb39@columbia.edu)

20

21

## 22   **Abstract**

23

24   Aging is associated with both overt and subclinical lung fibrosis, which increases risk for  
25   mortality from viruses and other respiratory pathogens. The molecular programs that induce  
26   fibrosis in the aging lung are not well understood. To overcome this knowledge gap, we  
27   undertook multimodal profiling of distal lung samples from healthy human donors across the  
28   lifespan. Telomere shortening, a cause of cell senescence and fibrosis, was progressive with  
29   age in a sample of 86 lungs and was associated with foci of DNA damage. Bulk RNA  
30   sequencing confirmed activation of cellular senescence and pro-fibrotic pathways as well as  
31   genes necessary for collagen processing with increasing age. These findings were validated in  
32   independent datasets for lung and sun-exposed skin, but not other organs including heart, liver  
33   and kidney. Cell type deconvolution analysis revealed a progressive loss of lung epithelial cells  
34   and an increasing proportion of fibroblasts. Consistent with the observed pro-fibrotic  
35   transcriptional profile, second harmonic imaging demonstrated increased density of interstitial  
36   collagen in aged human lungs. Furthermore, regions of parenchymal fibrosis were associated  
37   with decreased alveolar expansion and surfactant secretion. These findings reveal the

38 transcriptional and structural features of fibrosis and associated physiologic impairments in  
39 normal lung aging.

#### 40 **Main**

41 Lung capacity and resilience decline and susceptibility to disease increase with age<sup>1</sup>, but the  
42 molecular and structural mediators of this natural history are unknown<sup>2</sup>. Targeting respiratory  
43 aging therapeutically or prophylactically will require understanding of lung-specific molecular  
44 programs that change with age<sup>3-9</sup>. To characterize the effect of age on gene expression in lung,  
45 we prospectively collected 86 human donor lungs as part of the Lung Aging Cohort (LAC).  
46 Lungs were evenly distributed in age between 16 and 76 years (**Figure 1a-b**). Donors were not  
47 known to have any underlying pulmonary conditions, and gender, smoking status, and ethnicity  
48 are summarized in **Figure 1c** and detailed in **Table S1**. Tissue samples were harvested from  
49 distal lung and frozen in liquid nitrogen on receipt. RNA was later extracted from these samples  
50 for Illumina-based sequencing in a single run after cDNA library preparation.

51 Differential gene expression analysis using a multivariate linear model controlling for  
52 gender and smoking identified 22 genes that correlated significantly with age as a continuous  
53 variable in the LAC (**Figure 1d**). To validate this lung aging gene signature, we used publicly  
54 available data from the Genotype-Tissue Expression (GTEx) project of multiple tissues from  
55 over 300 individuals<sup>10</sup>. The LAC gene signature was also associated with age in the GTEx lung  
56 samples. Interestingly, overlap of the lung aging gene signature was found for aging of sun-  
57 exposed regions of skin, but not for non-sun-exposed skin, kidney or heart (**Figure 1e**).

58 Given the relevance of cellular senescence to aging, samples were interrogated for  
59 evidence of cell senescence markers and pathways. The canonical senescence marker p16  
60 (CDKN2A) was among the most highly upregulated genes in aging lungs (**Figure 2a**). To further  
61 assess for senescence reprogramming, we asked whether consensus senescence gene  
62 signatures that we recently defined by RNA-seq of senescent lung epithelial cells and  
63 fibroblasts<sup>11</sup> were upregulated in the LAC. The consensus senescence gene signatures were

64 increased with age in both the LAC and GTex Lung datasets (**Figure 2b**). We then performed  
65 Ingenuity Pathways Analysis (IPA) of genes associated with aging in the LAC (**Figure 2c; Table**  
66 **S2**), identifying pathways that were largely validated in GTex lung (**Figure 2d**). Consistent with  
67 cellular senescence, cell proliferation pathways were inhibited, and both p16 (CDKN2A) and  
68 p21 (CDKN1A) pathways were activated in aged lungs. Cell death pathways were also  
69 prominently activated. Overall, the marker-based analysis and IPA suggest activation of  
70 senescence and cell stress in aged lungs at steady state.

71 Cellular senescence has been associated with fibrotic lung disease, in part due to a  
72 senescence-associated secretory profile that has pro-fibrotic effects<sup>12-18</sup>. Therefore, we  
73 considered that cell senescence may also underlie aging-associated subclinical interstitial  
74 fibrosis, or interstitial lung abnormalities, a phenomenon recognized recently by radiographic  
75 studies of asymptomatic aged individuals<sup>19-21</sup>. These radiographic findings of fibrosis have been  
76 correlated with histopathologic features of fibrosis, including fibroblastic foci and subpleural  
77 distribution<sup>22</sup>. However, little is known about the molecular and cellular programs responsible for  
78 the pro-fibrotic evolution in aging lung. We first noted that pathways consistent with  
79 mesenchymal activation and fibrosis (TGF-beta pathway mediators and the epithelial-to-  
80 mesenchymal transition regulator TWIST1) were activated in aged lungs (**Figure 2c-d**). These  
81 results were largely confirmed in the GTEx lung dataset but not consistently in other organs  
82 (**Figure 2d**). Furthermore, several of the most highly upregulated genes (**Figure 1e**) have  
83 known pro-fibrotic effects; for example, RSPO4 has been associated with decline in lung  
84 function in patients with lung fibrosis<sup>23</sup>.

85 Next, since a major cell-intrinsic driver of senescence is telomere shortening, we isolated  
86 genomic DNA from the lung samples and used a quantitative PCR-based assay to measure  
87 telomere length. This analysis revealed that average lung telomere length progressively  
88 decreased across the lifespan (**Figure 2e**). Telomere attrition leads to telomere uncapping,  
89 which triggers a DNA damage response including p53 activation<sup>24</sup>. To test the significance of

90 telomere shortening to cellular states, gene expression was compared between subsamples  
91 that were significantly different in telomere length but approximately matched by age. IPA  
92 upstream regulator analysis of differentially expressed genes revealed that the canonical  
93 senescence regulators p53 and p16 were activated in association with decreased telomere  
94 length; furthermore, sites of DNA damage were increased in the short-telomere samples by  
95 gamma-H2ax immunohistochemistry (**Figure 2e**). These results suggest that age-associated  
96 lung telomere attrition likely contributes to the senescence profile observed by IPA.

97         Given the senescence and cell death profiles revealed by our analysis, we next asked  
98 whether lung aging is associated with changes in the cellular composition of the lung. To  
99 address this question, cell type deconvolution analysis was performed on the bulk RNA-seq  
100 data. First, SingleR<sup>25</sup> was used to annotate cell types from published single cell transcriptomes  
101 for 3 young, healthy human lungs.<sup>26</sup> Differential gene expression analysis confirmed  
102 characteristic markers for lung epithelial cells and fibroblasts (**Tables S3** and **S4**, respectively).  
103 MuSiC<sup>27</sup> was then applied to these SingleR-identified clusters of cell subtypes to deconvolve  
104 proportions of cell types in each LAC and GTex lung sample. Interestingly, the proportion of  
105 epithelial cells declined with age; on the other hand, the proportion of fibroblasts increased,  
106 consistent with fibrotic change in the aging lung (**Figure 3a**; **Figure S1a**). Within the epithelial  
107 compartment, we found specifically alveolar type 2 cells to decrease with age by  
108 immunostaining for the type 2 cell marker pro-SPC (**Figure 3b**). Type 2 cells are thought to be  
109 necessary for epithelial renewal in the lung, even at steady state.<sup>28</sup> Collectively, these findings  
110 support a DNA damage response resulting from telomere shortening, leading to epithelial  
111 senescence and pro-fibrotic pathway activation characterized by expansion of the mesenchyme  
112 in the aging human lung.

113         We noted no robust differences in expression of collagen genes between old and young.  
114 However, collagen accumulation is due not simply to excess collagen deposition, but also to an  
115 imbalance of collagen production and destruction, as well as changes in extracellular collagen



116 structure and stability<sup>29,30</sup>. Therefore, the oldest and youngest quintiles in the LAC were  
117 examined for expression of genes known to regulate post-translational processing of collagen,  
118 including lysyl oxidases, transglutaminases, and tissue inhibitors of matrix metalloproteases,  
119 which inhibit collagen turnover by metalloproteases. Remarkably, a large proportion of these  
120 genes were upregulated with age (**Figure 3c; Figure S1b**). We then tested whether the age-  
121 associated subset of these genes from the LAC could be validated in other datasets and found  
122 robust upregulation of the signature in the GTex lung cohort (**Figure 3c**), and for GTex sun-  
123 exposed skin, but not for multiple other organs (**Figure S1c**).

124         These changes in gene expression and cellular content of the lung led us to test the age  
125 dependence of collagen structure and distribution in young and aged human donor lungs by live  
126 two-photon microscopy. Second harmonic (SH) generation by extracellular collagen has been  
127 used to visualize the fibrillary structure of collagen in fixed tissues.<sup>31</sup> Here we applied the  
128 technique to live, unfixed human lungs. SH imaging revealed marked differences in the collagen  
129 pattern in young versus aged lungs in the subpleural space. In SH images of young lungs  
130 (age < 40 years), well-defined collagen fibers of 1 micron thickness were regularly evident with  
131 interfibrillar spaces of 3-5 microns (**Figure 4ai**). Fluorescence analyses along lines drawn on  
132 the x-y planes of these images revealed a fluorescent spike where the analysis line intersected  
133 a fibril, while the low inter-spike fluorescence reflected the collagen-free interfibrillar space  
134 (**Figure 4b**). In aged lungs (age > 65 years) a similar fibrillar pattern was also evident in some  
135 regions, but in other regions the spiked fibrillar pattern was notably absent (**Figure 4aii, 4b**). In  
136 these regions line analyses revealed dense packing of considerably thinner fibers (**Figure 4b**).  
137 Area analysis of SH fluorescence quantified in the Z direction starting at the pleural surface  
138 revealed Gaussian distributions of fluorescence intensity reflecting intensity and depth of  
139 subpleural collagen deposition (**Figure 4c**). Notably, subpleural collagen density varied  
140 considerably between different regions of the same lung for both young and old donors, as  
141 indicated by the spread of density values for each lung (**Figure 4d**). On average collagen

142 density was higher in the older age group (**Figure 4e**). In the alveolar interstitium subjacent to  
143 the pleural space, collagen density was about ten times less than in the subpleural region  
144 (**Figure 4f**). However, here too older lungs had higher interstitial collagen density (**Figure 4g**).

145 To determine whether increased collagen density impeded alveolar expansion, we  
146 carried out optical quantification of alveolar dimensions at low and high transpulmonary  
147 pressures (**Figure 4h**). This analysis demonstrated that there was a monotonic loss of alveolar  
148 expansion with age (**Figure 4i**) and that this loss correlated with collagen density (**Figure 4j**).  
149 Thus with age, alveolar expansion was limited by a constraining effect of increased peri-alveolar  
150 and subpleural collagen. Alveolar expansion causes secretion of surfactant, which maintains  
151 alveolar patency and provides epithelial defense against inhaled pathogens. To quantify the  
152 variability of surfactant secretion, a fluorescence approach was used quantify surfactant  
153 secretion at the single alveolar level.<sup>32</sup> Our data indicate a strong negative correlation of  
154 surfactant secretion with age and with collagen density (**Figure 4k-m**).

155 Alveoli serve as essential gas exchange units that must inflate for effective ventilation, a  
156 process that deteriorates with age and can be limited by fibrosis<sup>33</sup>. Our results reveal cellular  
157 and molecular changes that occur in human lung aging. These include telomere shortening, loss  
158 of cellular proliferation, activation of cellular senescence programming, TGF $\beta$  signaling, and  
159 increased expression of collagen-regulatory genes. These changes lead to loss of alveolar type  
160 2 cells, fibroblast expansion, and accumulation of interstitial collagen. Live lung imaging  
161 revealed regions of interstitial fibrosis in aged lungs, which were associated with local alveolar  
162 dysfunction. Collectively, these results shed light on the molecular pathways underlying fibrotic  
163 evolution in natural lung aging.

164 Acute respiratory distress syndrome (ARDS) is a major cause of mortality from acute  
165 lung infections and injury, and advanced age is associated with worse outcomes.<sup>34</sup> Recent data  
166 have demonstrated an association between the subclinical fibrosis seen with aging, or interstitial  
167 lung abnormalities, and severe ARDS.<sup>35</sup> Furthermore, telomere shortening in peripheral blood

168 leukocytes was associated with increased severity and mortality from ARDS.<sup>36</sup> The lung  
169 parenchymal telomere shortening observed in our study, the associated cellular senescence,  
170 and the resulting pro-fibrotic change suggest a mechanism for respiratory vulnerability with  
171 normal aging. Furthermore, the findings implicate a mechanism in common with pathologic lung  
172 fibrosis, where telomere shortening is a root cause<sup>13,15</sup>. Our study does not distinguish  
173 chronological aging from environmental insults accumulated over the lifespan, which are likely  
174 to be relevant given many genes and pathways in common with sun-exposed skin. Future  
175 studies should build on these findings and test the relative weight of cell autonomous and  
176 environmental effects, and also how senescence programs impair reparative responses to  
177 incident lung injury and infection.

178

## 179 **Methods**

### 180 *Participants*

181 RNA-seq, type 2 cell immunofluorescence, and telomere length analyses were done with the  
182 Lung Aging Cohort, which consists of 86 donor lungs collected between 2012 and 2018 and  
183 made available by the Donor West Network<sup>37</sup>. Fresh tissue fragments were snap-frozen in liquid  
184 nitrogen within 48 hours of x-clamp. Age, sex, ethnicity, smoking status, and cause of death  
185 were recorded. Second harmonic microscopy and surfactant studies were done with intact  
186 human lungs obtained from brain dead organ donors at the time of tissue acquisition for life-  
187 saving transplantation as described<sup>38-40</sup> through a collaboration and protocol with LiveOnNY, the  
188 organ procurement organization for the New York area. Demographic data are detailed in **Table**

### 189 **S1.**

190

### 191 *Bulk RNA Sequencing*

192 Total RNA was isolated using the miRNeasy Mini Kit (Qiagen, Valencia, CA, USA). Extracted  
193 RNA samples were sent to Novogene for library construction and sequencing. Quantitation and

194 quality control were done in three steps including NanoDrop (Thermo Fisher Scientific Inc.,  
195 Waltham, MA), agarose gel electrophoresis, and Agilent 2100 Bioanalyzer (Agilent  
196 Technologies, Palo Alto, CA). mRNA was enriched using oligo(dT) beads and fragmented, and  
197 then cDNA was synthesized. Purified and processed cDNA libraries were checked on Agilent  
198 2100 for insert size and quantified on Qubit and by qPCR. PE 150bp sequencing was done on  
199 Novaseq6000 machines to a sequencing depth of at least 6Gb for each sample. Adapter  
200 trimming and alignment to the reference genome were done using STAR software.<sup>41</sup> Multi-factor  
201 differential expression analysis for age, smoking, and gender was done with DESeq2 and the  
202 likelihood ratio test was used for hypothesis testing.

203

#### 204 *Telomere length qPCR*

205 Genomic DNA was isolated from snap-frozen lung tissues using the Genra Puregene Kit  
206 (Qiagen). DNA samples were run on 1% agarose gel electrophoresis for quality control and  
207 quantified using the NanoDrop spectrophotometer (Thermo Fisher Scientific Inc.). For each  
208 sample, cycle threshold values for telomere and the reference housekeeping gene (36B4) were  
209 determined in triplicates using quantitative PCR, as previously described<sup>42,43</sup>. Delta Ct was  
210 calculated by subtracting the mean telomere cycle threshold from the mean 36B4 cycle  
211 threshold. Three cell line standards with known telomere lengths were used to graph a standard  
212 curve, from which sample telomere lengths were calculated. Samples with standard deviation of  
213 triplicates higher than 0.25 were excluded.

214

#### 215 *Ingenuity Pathways Analysis, Gene Set Enrichment Analysis, and ssGSEA*

216 Pathway Analysis was done using the Ingenuity Pathways Analysis software (Qiagen).  
217 Differentially expressed genes with  $p \leq 0.05$  were used for analysis. Analysis results with  $p$   
218  $\leq 0.05$  were considered significant. Gene Set Enrichment Analysis was done on the GSEA

219 software.<sup>44,45</sup> Pearson metric was used for ranking genes, and a weighted enrichment statistic  
220 was used. Single sample gene set enrichment scores were computed on R using Singscore<sup>46</sup>.

221

#### 222 *Analysis of publicly available data*

223 The Genotype-Tissue Expression (GTEx) Project<sup>10</sup> data (release V8) used for the analyses  
224 were obtained from the GTEx Portal (<https://gtexportal.org/>) on 8/20/2020. RNA-seq gene read  
225 counts, sample attributes, and subject phenotypes were downloaded for differential expression  
226 and subsequent analyses. Human lung single cell data used for cell type deconvolution analysis  
227 were downloaded from Reyfman et al<sup>26</sup> (GSE122960).

228

#### 229 *Immunohistochemistry and Immunofluorescence*

230 Lungs were fixed with 10% formalin overnight and transferred to 70% ethanol before embedding  
231 in paraffin and sectioning to 4µm thickness. For immunohistochemistry of gamma-h2ax,  
232 sections were deparaffinized in xylene and rehydrated in an ethanol gradient series. Antigen  
233 retrieval was done by microwaving for 6 minutes in citrate buffer pH 6 (Sigma). After quenching  
234 in 3% H<sub>2</sub>O<sub>2</sub> in Methanol, sections were permeabilized in 0.5% Triton X-100 in PBS. Sections  
235 were blocked in 3% BSA, 0.1% Triton X-100, 5% normal goat serum in PBS for 1 hour and  
236 incubated at 4°C overnight with primary antibody (Biolegend, cat. 613402, dilution 1:500), then  
237 at room temperature for 3 hours with secondary antibody (Santa Cruz Biotechnology, cat. sc-  
238 2005, 1:1000). Sections were developed in DAB working solution (Vector Laboratories) for 8  
239 minutes, washed, dehydrated, and mounted with Cytoseal. All washes between steps were  
240 done with 1X PBS.

241 For immunofluorescence of pro-SPC, sections were deparaffinized, antigen retrieved,  
242 and permeabilized. Sections were blocked in 3% BSA, 0.1% Triton X-100, 5% normal donkey  
243 serum in PBS for 1 hour and incubated at 4°C overnight with primary antibody (EMD Millipore,  
244 cat. Ab3786, 1:300), then at room temperature for 1 hour with Alexa Fluor 594-conjugated

245 secondary antibody (Life Technologies, cat. A21207, 1:1000). Sections were then washed and  
246 mounted with mounting medium with DAPI (Vector Laboratories). All washes between steps  
247 were done with 1X PBS on Day 1, and PBST (1:1000) on Day 2. Images were acquired on a  
248 Zeiss AxioScope 5 microscope. Immunoreactive cells were counted while blinded to the ages of  
249 the immunostained lungs.

250

### 251 *Cell type deconvolution*

252 Cell type deconvolution of bulk RNA-seq data from the LAC was performed with MuSiC<sup>27</sup>, a  
253 publicly available computational resource. ScRNA-seq data from 3 young lungs aged 20-30  
254 years (donors 3, 6, and 8) published by Reyfman et al.<sup>26</sup> were clustered by Seurat<sup>47</sup> and  
255 annotated for cell type by SingleR<sup>25</sup> followed by the MuSiC workflow for cell type proportion  
256 analysis.

257

### 258 *Live two-photon imaging of human lungs*

259 Two-photon and confocal microscopy were carried out on live, de-identified human lungs  
260 obtained after ~20 hours of cold ischemia. The lingular lobe, which provides a flat surface  
261 convenient for live microscopy, was positioned below the objective of a two-photon microscope  
262 (TCS SP8, Leica). The lobe was perfused with buffer through the cannulated lobar artery at  
263 infusion pressure of 10 cmH<sub>2</sub>O, while inflated at alveolar pressure of 5 cmH<sub>2</sub>O through a  
264 bronchial cannula. We subpleurally injected fluorescent dyes through a 31-gauge needle. We  
265 detected subpleural collagen as the fluorescence of second harmonic generation (SHG) at an  
266 excitation and emission wavelengths of 830 nm and 425-460 nm, respectively. Non-specific  
267 autofluorescence and photobleaching were eliminated by appropriate gain setting. We  
268 quantified subpleural collagen density as the integrated collagen fluorescence per cubic  
269 centimeter in the space between the visceral pleura and the alveolar epithelium. Stretch-  
270 induced surfactant secretion was initiated by a single 15-second hyperinflation induced by

271 increasing airway pressure from 5 to 15 cmH<sub>2</sub>O. We quantified surfactant secretion by the  
272 timed appearance of lipid-sensitive fluorescence in the alveolar space<sup>32</sup>.

273

#### 274 *Statistical Analysis*

275 Statistical analysis for comparison of two groups was done using the unpaired, two-sided, two-  
276 samples t-test. For comparison of multiple groups, 1-way ANOVA was used. Pearson  
277 correlation coefficient R was calculated to assess association of two continuous variables.  
278 Unless otherwise stated, a p-value less than 0.05 was considered significant. Multiple  
279 hypothesis testing using Benjamini-Hochberg method was done when appropriate.

280

#### 281 *Study Approval*

282 Tissue samples were obtained from brain-dead (deceased) individuals, and thus this study does  
283 not qualify as human subjects research, as confirmed by the UCSF and Columbia University  
284 IRBs.

285

#### 286 **References**

- 287 1. Thomas, E.T., Guppy, M., Straus, S.E., Bell, K.J.L. & Glasziou, P. Rate of normal lung  
288 function decline in ageing adults: a systematic review of prospective cohort studies. *BMJ*  
289 *Open* **9**, e028150 (2019).
- 290 2. Meiners, S., Eickelberg, O. & Konigshoff, M. Hallmarks of the ageing lung. *Eur Respir J* **45**,  
291 807-827 (2015).
- 292 3. Lewis, S. Targeting senescence. *Nat Rev Neurosci* **20**, 317 (2019).
- 293 4. Ovadya, Y. & Krizhanovsky, V. Strategies targeting cellular senescence. *J Clin Invest* **128**,  
294 1247-1254 (2018).
- 295 5. Xu, M., *et al.* Senolytics improve physical function and increase lifespan in old age. *Nat*  
296 *Med* **24**, 1246-1256 (2018).
- 297 6. Baker, D.J., *et al.* Clearance of p16Ink4a-positive senescent cells delays ageing-  
298 associated disorders. *Nature* **479**, 232-236 (2011).
- 299 7. Baar, M.P., *et al.* Targeted Apoptosis of Senescent Cells Restores Tissue Homeostasis in  
300 Response to Chemotoxicity and Aging. *Cell* **169**, 132-147 e116 (2017).
- 301 8. Calimport, S.R.G., *et al.* To help aging populations, classify organismal senescence.  
302 *Science* **366**, 576-578 (2019).



- 303 9. Campisi, J., *et al.* From discoveries in ageing research to therapeutics for healthy ageing.  
304 *Nature* **571**, 183-192 (2019).
- 305 10. Consortium, G.T. The Genotype-Tissue Expression (GTEx) project. *Nat Genet* **45**, 580-585  
306 (2013).
- 307 11. DePianto, D.J., *et al.* Molecular mapping of interstitial lung disease reveals a  
308 phenotypically distinct senescent basal epithelial cell population. Manuscript  
309 submitted/reviewed/under revision.
- 310 12. Naikawadi, R.P., *et al.* Telomere dysfunction in alveolar epithelial cells causes lung  
311 remodeling and fibrosis. *JCI Insight* **1**, e86704 (2016).
- 312 13. Alder, J.K., *et al.* Short telomeres are a risk factor for idiopathic pulmonary fibrosis. *Proc*  
313 *Natl Acad Sci U S A* **105**, 13051-13056 (2008).
- 314 14. Schafer, M.J., *et al.* Cellular senescence mediates fibrotic pulmonary disease. *Nat*  
315 *Commun* **8**, 14532 (2017).
- 316 15. Snetselaar, R., *et al.* Short telomere length in IPF lung associates with fibrotic lesions and  
317 predicts survival. *PLoS One* **12**, e0189467 (2017).
- 318 16. Minagawa, S., *et al.* Accelerated epithelial cell senescence in IPF and the inhibitory role  
319 of SIRT6 in TGF-beta-induced senescence of human bronchial epithelial cells. *Am J*  
320 *Physiol Lung Cell Mol Physiol* **300**, L391-401 (2011).
- 321 17. Wolters, P.J., *et al.* Time for a change: is idiopathic pulmonary fibrosis still idiopathic and  
322 only fibrotic? *Lancet Respir Med* **6**, 154-160 (2018).
- 323 18. Hecker, L., *et al.* Reversal of persistent fibrosis in aging by targeting Nox4-Nrf2 redox  
324 imbalance. *Sci Transl Med* **6**, 231ra247 (2014).
- 325 19. Hatabu, H., *et al.* Interstitial lung abnormalities detected incidentally on CT: a Position  
326 Paper from the Fleischner Society. *Lancet Respir Med* **8**, 726-737 (2020).
- 327 20. Bernstein, E.J., *et al.* Rheumatoid arthritis-associated autoantibodies and subclinical  
328 interstitial lung disease: the Multi-Ethnic Study of Atherosclerosis. *Thorax* **71**, 1082-1090  
329 (2016).
- 330 21. Araki, T., *et al.* Development and Progression of Interstitial Lung Abnormalities in the  
331 Framingham Heart Study. *Am J Respir Crit Care Med* **194**, 1514-1522 (2016).
- 332 22. Miller, E.R., *et al.* Histopathology of Interstitial Lung Abnormalities in the Context of  
333 Lung Nodule Resections. *Am J Respir Crit Care Med* **197**, 955-958 (2018).
- 334 23. Todd, J.L., *et al.* Peripheral blood proteomic profiling of idiopathic pulmonary fibrosis  
335 biomarkers in the multicentre IPF-PRO Registry. *Respir Res* **20**, 227 (2019).
- 336 24. d'Adda di Fagagna, F., *et al.* A DNA damage checkpoint response in telomere-initiated  
337 senescence. *Nature* **426**, 194-198 (2003).
- 338 25. Aran, D., *et al.* Reference-based analysis of lung single-cell sequencing reveals a  
339 transitional profibrotic macrophage. *Nat Immunol* **20**, 163-172 (2019).
- 340 26. Reyfman, P.A., *et al.* Single-Cell Transcriptomic Analysis of Human Lung Provides Insights  
341 into the Pathobiology of Pulmonary Fibrosis. *Am J Respir Crit Care Med* **199**, 1517-1536  
342 (2019).
- 343 27. Wang, X., Park, J., Susztak, K., Zhang, N.R. & Li, M. Bulk tissue cell type deconvolution  
344 with multi-subject single-cell expression reference. *Nat Commun* **10**, 380 (2019).
- 345 28. Barkauskas, C.E., *et al.* Type 2 alveolar cells are stem cells in adult lung. *J Clin Invest* **123**,  
346 3025-3036 (2013).

- 347 29. Podolsky, M.J., *et al.* Age-dependent regulation of cell-mediated collagen turnover. *JCI*  
348 *Insight* **5**(2020).
- 349 30. McKleroy, W., Lee, T.H. & Atabai, K. Always cleave up your mess: targeting collagen  
350 degradation to treat tissue fibrosis. *Am J Physiol Lung Cell Mol Physiol* **304**, L709-721  
351 (2013).
- 352 31. Brown, E., *et al.* Dynamic imaging of collagen and its modulation in tumors in vivo using  
353 second-harmonic generation. *Nat Med* **9**, 796-800 (2003).
- 354 32. Ashino, Y., Ying, X., Dobbs, L.G. & Bhattacharya, J. [Ca(2+)](i) oscillations regulate type II  
355 cell exocytosis in the pulmonary alveolus. *Am J Physiol Lung Cell Mol Physiol* **279**, L5-13  
356 (2000).
- 357 33. Budinger, G.R.S., *et al.* The Intersection of Aging Biology and the Pathobiology of Lung  
358 Diseases: A Joint NHLBI/NIA Workshop. *J Gerontol A Biol Sci Med Sci* **72**, 1492-1500  
359 (2017).
- 360 34. Gajic, O., *et al.* Prediction of death and prolonged mechanical ventilation in acute lung  
361 injury. *Crit Care* **11**, R53 (2007).
- 362 35. Putman, R.K., *et al.* Interstitial Lung Abnormalities Are Associated with Acute  
363 Respiratory Distress Syndrome. *Am J Respir Crit Care Med* **195**, 138-141 (2017).
- 364 36. Liu, S., *et al.* Peripheral blood leukocyte telomere length is associated with survival of  
365 sepsis patients. *Eur Respir J* **55**(2020).
- 366 37. Ware, L.B., *et al.* Assessment of lungs rejected for transplantation and implications for  
367 donor selection. *Lancet* **360**, 619-620 (2002).
- 368 38. Carpenter, D.J., *et al.* Human immunology studies using organ donors: Impact of clinical  
369 variations on immune parameters in tissues and circulation. *Am J Transplant* **18**, 74-88  
370 (2018).
- 371 39. Thome, J.J., *et al.* Spatial map of human T cell compartmentalization and maintenance  
372 over decades of life. *Cell* **159**, 814-828 (2014).
- 373 40. Kumar, B.V., *et al.* Human Tissue-Resident Memory T Cells Are Defined by Core  
374 Transcriptional and Functional Signatures in Lymphoid and Mucosal Sites. *Cell Rep* **20**,  
375 2921-2934 (2017).
- 376 41. Dobin, A., *et al.* STAR: ultrafast universal RNA-seq aligner. *Bioinformatics* **29**, 15-21  
377 (2013).
- 378 42. Cawthon, R.M. Telomere measurement by quantitative PCR. *Nucleic Acids Res* **30**, e47  
379 (2002).
- 380 43. Listerman, I., Sun, J., Gazzaniga, F.S., Lukas, J.L. & Blackburn, E.H. The major reverse  
381 transcriptase-incompetent splice variant of the human telomerase protein inhibits  
382 telomerase activity but protects from apoptosis. *Cancer Res* **73**, 2817-2828 (2013).
- 383 44. Mootha, V.K., *et al.* PGC-1alpha-responsive genes involved in oxidative phosphorylation  
384 are coordinately downregulated in human diabetes. *Nat Genet* **34**, 267-273 (2003).
- 385 45. Subramanian, A., *et al.* Gene set enrichment analysis: a knowledge-based approach for  
386 interpreting genome-wide expression profiles. *Proc Natl Acad Sci U S A* **102**, 15545-  
387 15550 (2005).
- 388 46. Foroutan, M., *et al.* Single sample scoring of molecular phenotypes. *BMC Bioinformatics*  
389 **19**, 404 (2018).

390 47. Butler, A., Hoffman, P., Smibert, P., Papalexi, E. & Satija, R. Integrating single-cell  
391 transcriptomic data across different conditions, technologies, and species. *Nat*  
392 *Biotechnol* **36**, 411-420 (2018).

393

394

#### 395 **Author contributions**

396 J.L. did telomere length measurement and immunofluorescence and performed computational  
397 analyses with help from K.B. and L.M. and under the supervision of M.B., D.A., W.E., and S.C.  
398 D.J.D. and J.R.A. derived and helped J.L. in applying the consensus senescence marker  
399 analysis. R.M. and M.K. procured LiveOnNY donor network lungs under the supervision of  
400 D.L.F. M.N.I. performed second harmonic and surfactant microscopy under the supervision of  
401 J.B., S.B., and D.L.F. M.B., P.J.W, and J.B. conceived of the work, supervised experimental  
402 planning and analysis, and co-wrote the manuscript with input from M.M.

403

#### 404 **Acknowledgements**

405 This work was supported by NIH HL131560 and institutional startup funds to M.B., NIH  
406 HL139897 to P.W., HL145547 to D.F. and J.B., NIH HL36024 and HL57556 to J.B., and the  
407 Nina Ireland Program for Lung Health to M.B. and P.W.

408

#### 409 **Competing Interests**

410 D.J.D. and J.R.A. are current employees of Genentech and shareholders in Roche.

**Figure 1 RNA-seq reveals a lung-specific aging signature.** **a**, Schematic of the lung aging cohort (LAC), a study of human lungs varying in age across the adult lifespan and profiled with multiple approaches. **b**, Participant age plotted against increasing order of age. **c**, Demographic features. **d**, Heatmap of gene expression by bulk RNA-seq of distal lung. Genes listed were significantly correlated with age in a multivariate generalized linear model controlling for smoking and gender (FDR  $p < 0.1$ ). Z scores represent within-gene relative expression across samples. **e**, Heatmap of Pearson correlation coefficients between gene expression and age for the LAC and multiple GTex tissue datasets.

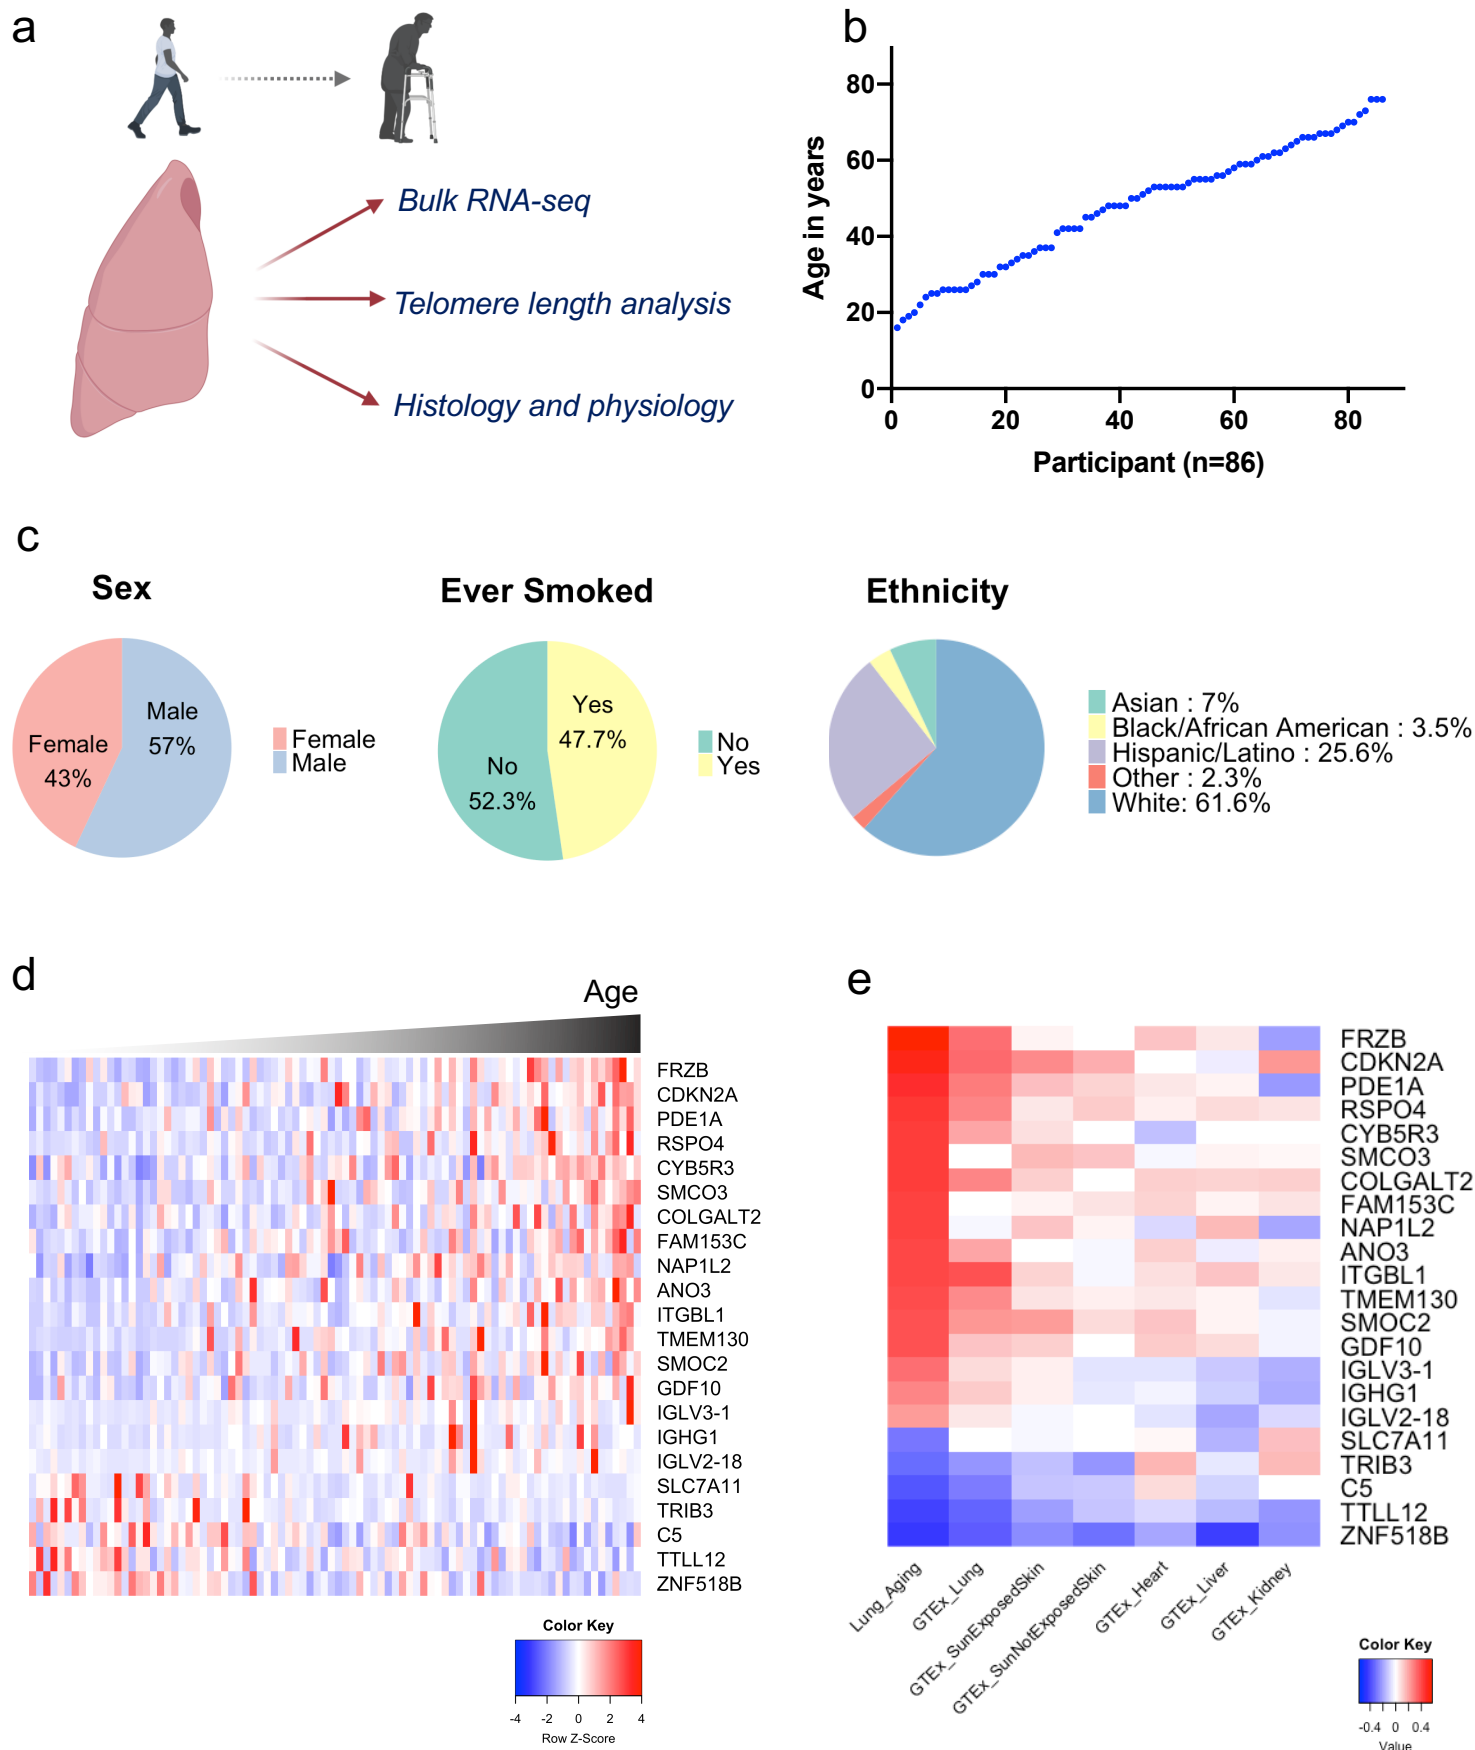

**Figure 2 Lung cellular senescence increases with aging.** **a**, p16 expression by age in the LAC (log scale). Pearson R is shown. **b**, Gene set enrichment analysis of 11 consensus senescence markers from DePianto et al<sup>11</sup> (p=0.004). Single sample geneset enrichment analysis using the 11-gene signature is shown for individuals in the LAC (total N=34) and GTex lung (total N=138). P values are for two-sided Student's t-test. **c**, Ingenuity Pathways Analysis (IPA) computed with the genes from LAC that were correlated with age at p<0.05 level of significance. **d**, Genes used for IPA in (c) were used to compute IPA results for the same pathways in multiple other datasets. Z-scores are shown for pathways reaching significance at P<0.05. Pathways in grey were not detected or not significant. **e**, qPCR-quantified telomere length plotted by age for the LAC. Pearson R is shown. The circled subsamples differ in telomere length (1=long, 2=short) and were used for gamma-H2ax immunohistochemistry, with representative images and quantitation to the right (n=3 in each group, two-tailed Student's t-test p value is shown). Differential gene expression of the subsamples by bulk RNA-seq was used for IPA and predicted activity of upstream senescence regulators in the short telomere subgroup, with Z scores and p values shown in the table.

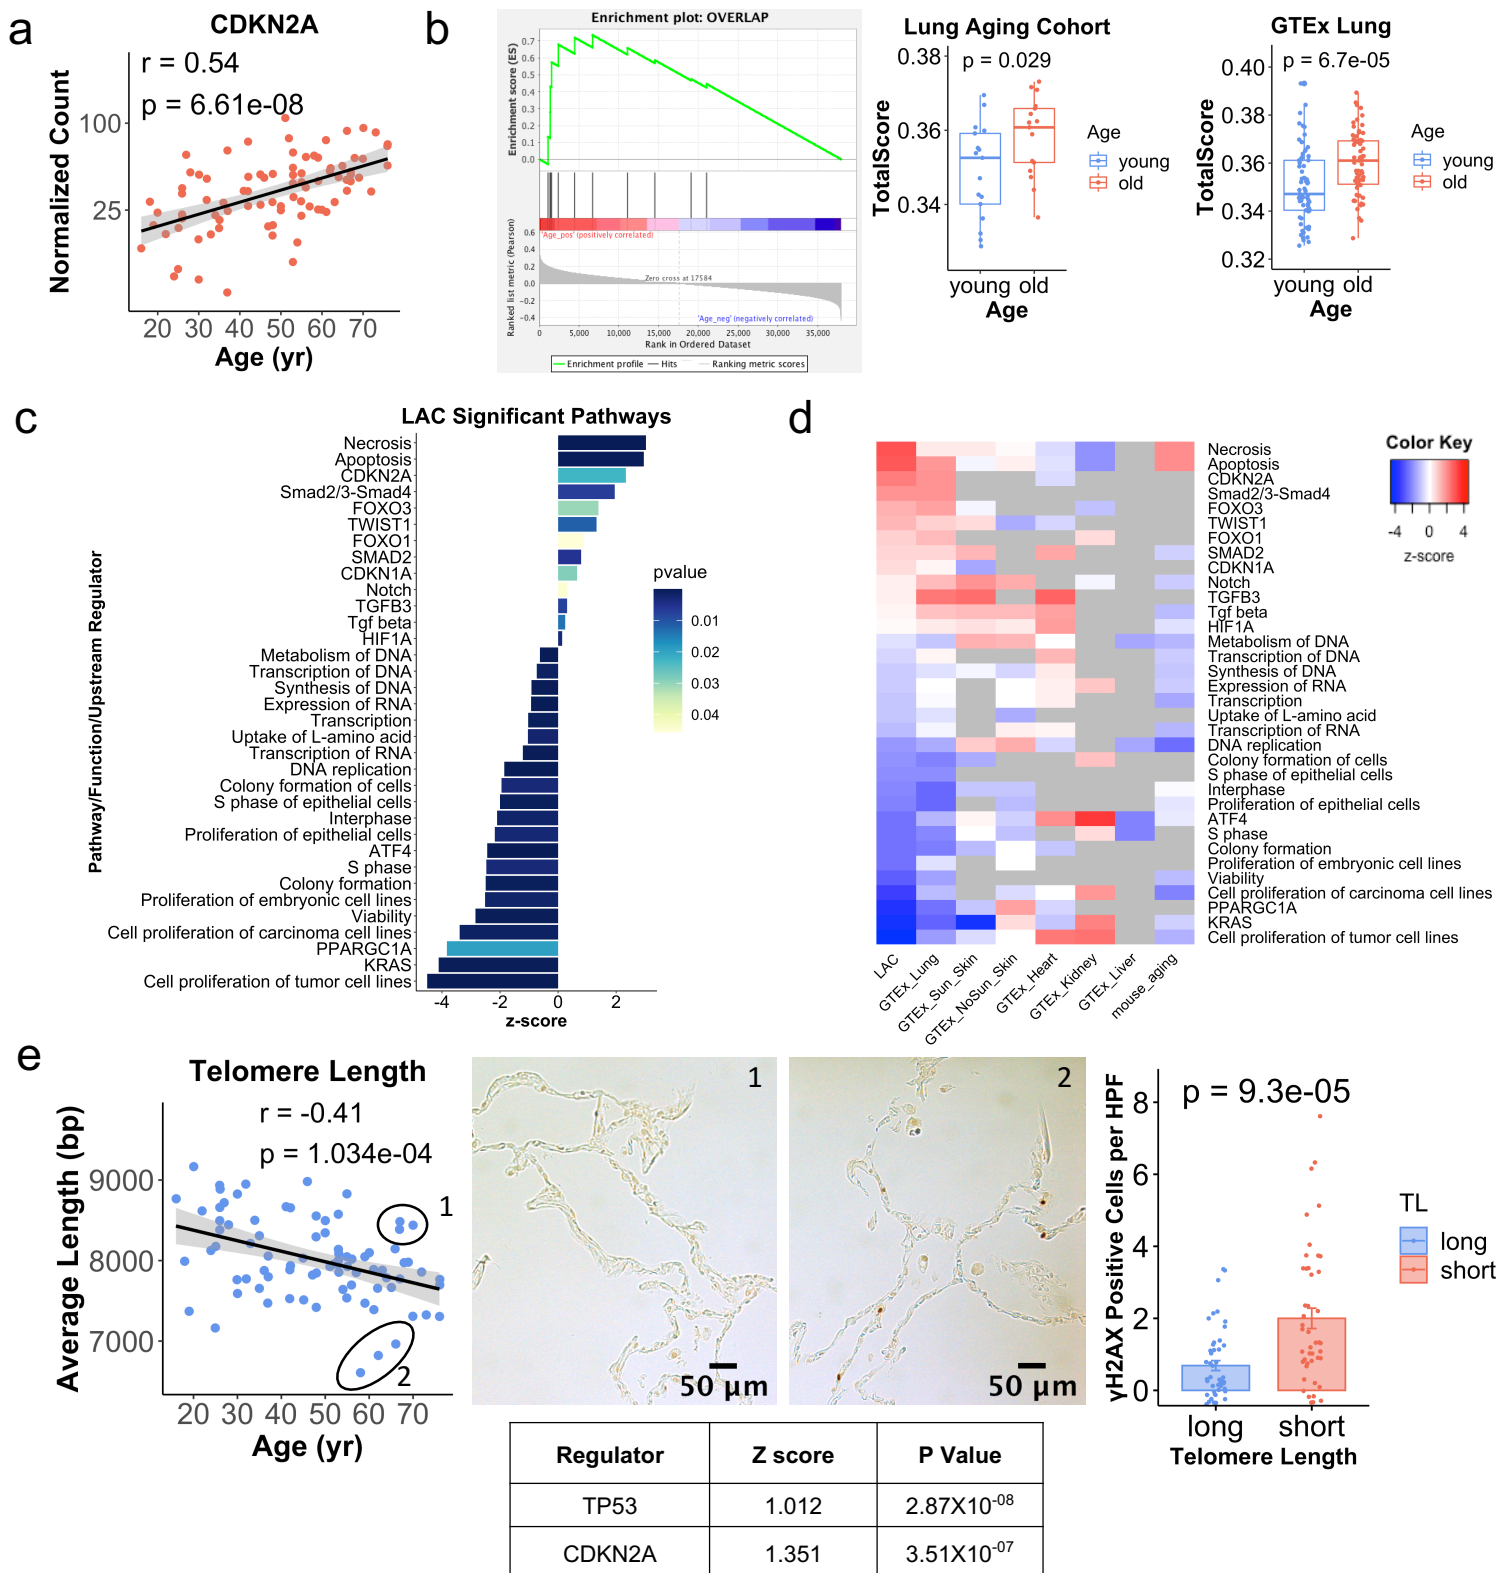



**Figure 3 Fibrotic programs in lung aging.** **a**, Cell type deconvolution of bulk RNA-seq data from the LAC and GTex Lung. Age for GTex is represented in decades. Pearson R and p values are shown for LAC, and 1-way ANOVA is shown for GTex. Boxplots show the median, first and third quartiles, and 1.5\*IQR. **b**, Quantification of type 2 cells in old and young lungs by labeling of SPC+ cells, with quantification (N=4 individuals in each group, donor age and gender are shown). P value is for two-tailed Student's t-test comparing all old and all young samples. **c**, Collagen-processing gene expression in the LAC by gene set enrichment analysis ( $p=2.004e-04$ ). Single sample gene set enrichment analysis is plotted for the genes enriched in aging (genes listed in Fig S1) in the oldest and youngest quintiles from the LAC and GTex Lung. P values are for two-tailed Student's t-test.

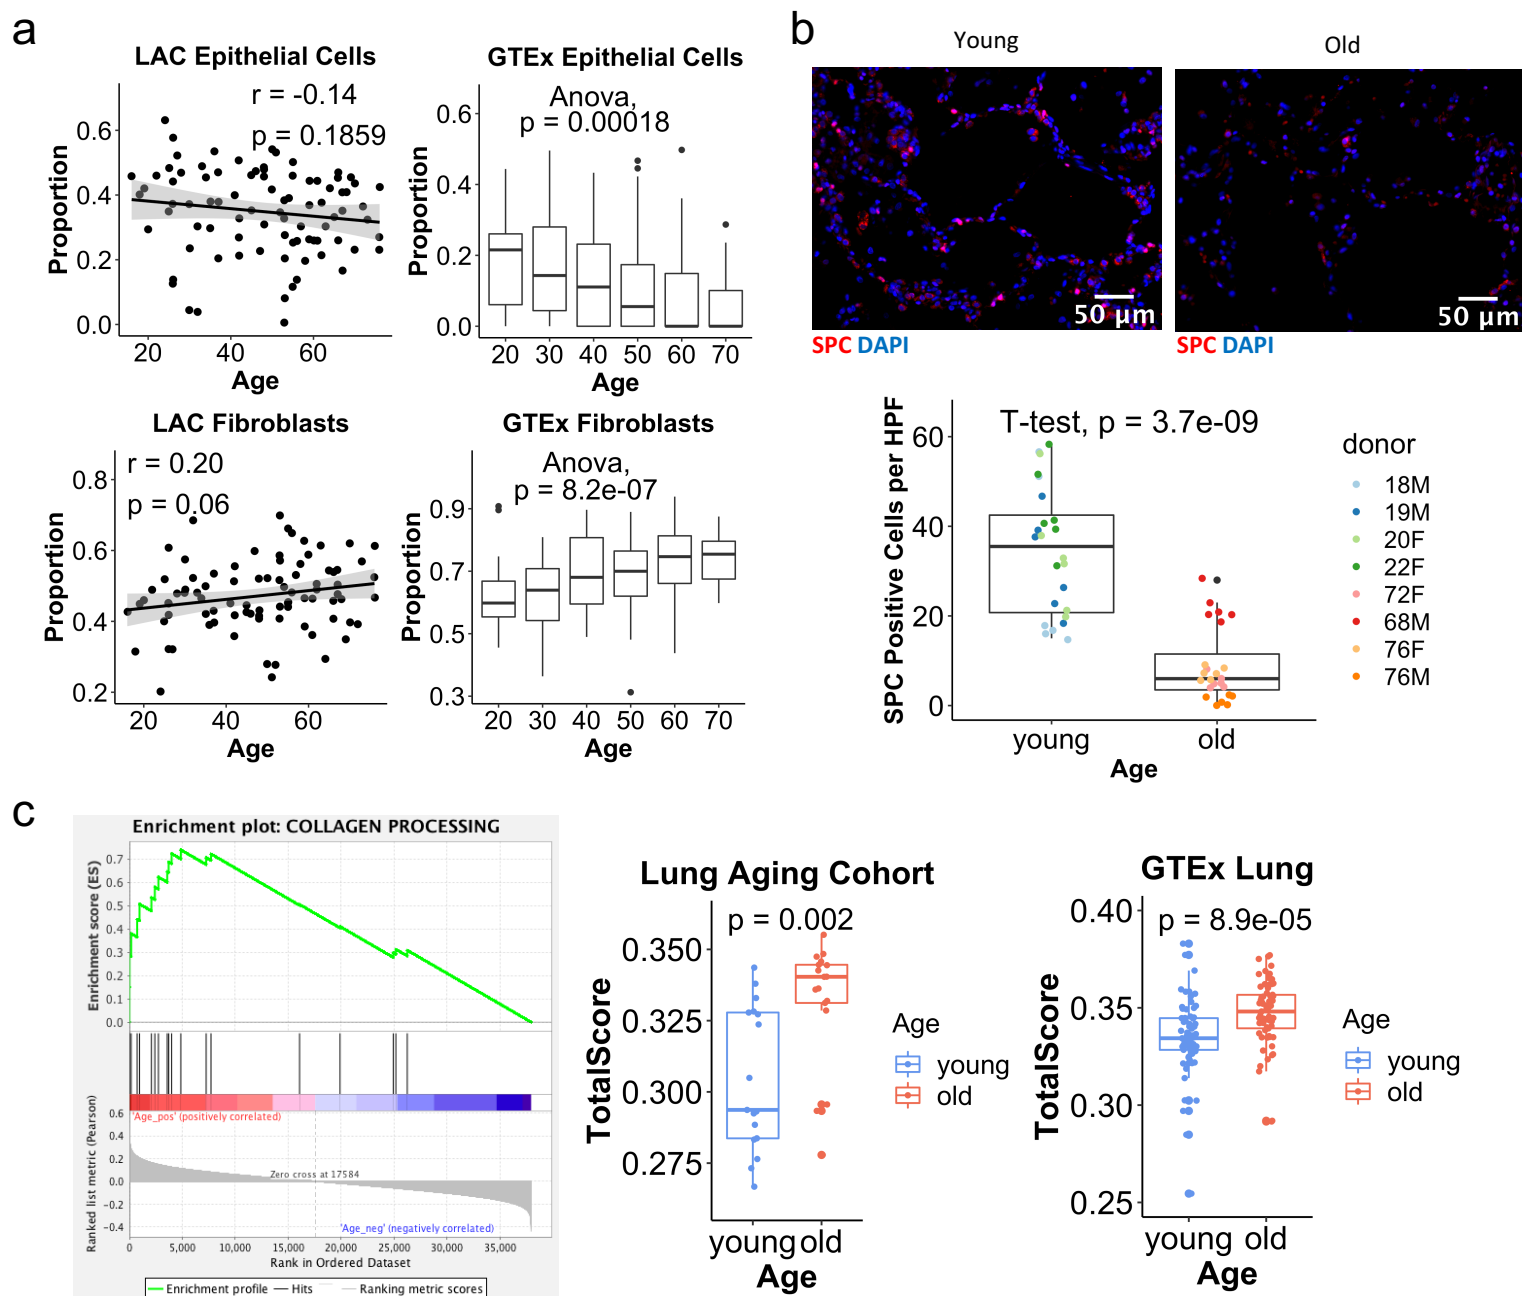

**Figure 4 Aging-associated fibrosis limits alveolar expansion and surfactant secretion.** **a-b** Two-photon images (*i* and *ii*) show collagen fluorescence by second harmonic generation in the subpleural interstitium of an 18 (left) and an 86 (right) year-old lung. Adjacent panels show collagen fluorescence in the depth plane (*y-z*) along the indicated lines (*dashed lines*). Tracings in (*b*) represent fluorescence intensity along the lengths of the dashed lines (“distance”). **c-e**, Imaging was carried out across a tissue volume calculated as the product of the area and the depth of the imaged field (see sketch). Tracings in (*c*) are from two representative fields and quantify collagen fluorescence along the depth axis from the pleural margin. In (*d*) “collagen density” was calculated as the summed fluorescence per unit volume for multiple fields in each lung. (Each color indicates a separate lung.) Group data are shown in (*e*). Bars: Mean±SEM, *n*=7 and 4 lungs respectively for 18-50 and 51-86 groups. \**p*<0.05 versus 18-50 group by Student’s *t*-test. **f-g**, Images and group data show peri-alveolar collagen. Bars: Mean±SEM, *n*=7 and 4 lungs respectively for 18-50 and 51-86 groups. \**p*<0.05 versus 18-50 group by Student’s *t*-test. **h**, Confocal images show an alveolus (*alv*) stained with the intracellular dye calcein-AM. Alveoli were imaged at alveolar pressures 5 (*green*) and 20 cmH<sub>2</sub>O (*red*). A select region (*rectangle in merge*) was magnified to show alveolar expansion during stretch. **i-j**, Alveolar expansions were plotted for individual imaged fields versus donor age (*i*) and subpleural collagen densities (*j*). *P* values were computed by linear regression. **k**, The images show an alveolus stained with calcein-AM (*green*), and the extracellular lipid dye, FM1-43 (*red*). A selected region (*rectangle in left image*) was magnified in the middle and right images. Alveolar stretch caused surfactant secretion as indicated by time-dependent increase of red fluorescence (*arrow*). **l**, Group data show stretch-induced surfactant secretion responses. Mean±SEM, *n*=7 and 4 lungs respectively for 18-50 and 51-86 groups. *P* value was computed by Student’s *t*-test. **m**, Surfactant secretion to alveolar stretch is plotted as a single dot for each alveolus across the indicated subpleural collagen density range. *P* value was computed by linear regression.

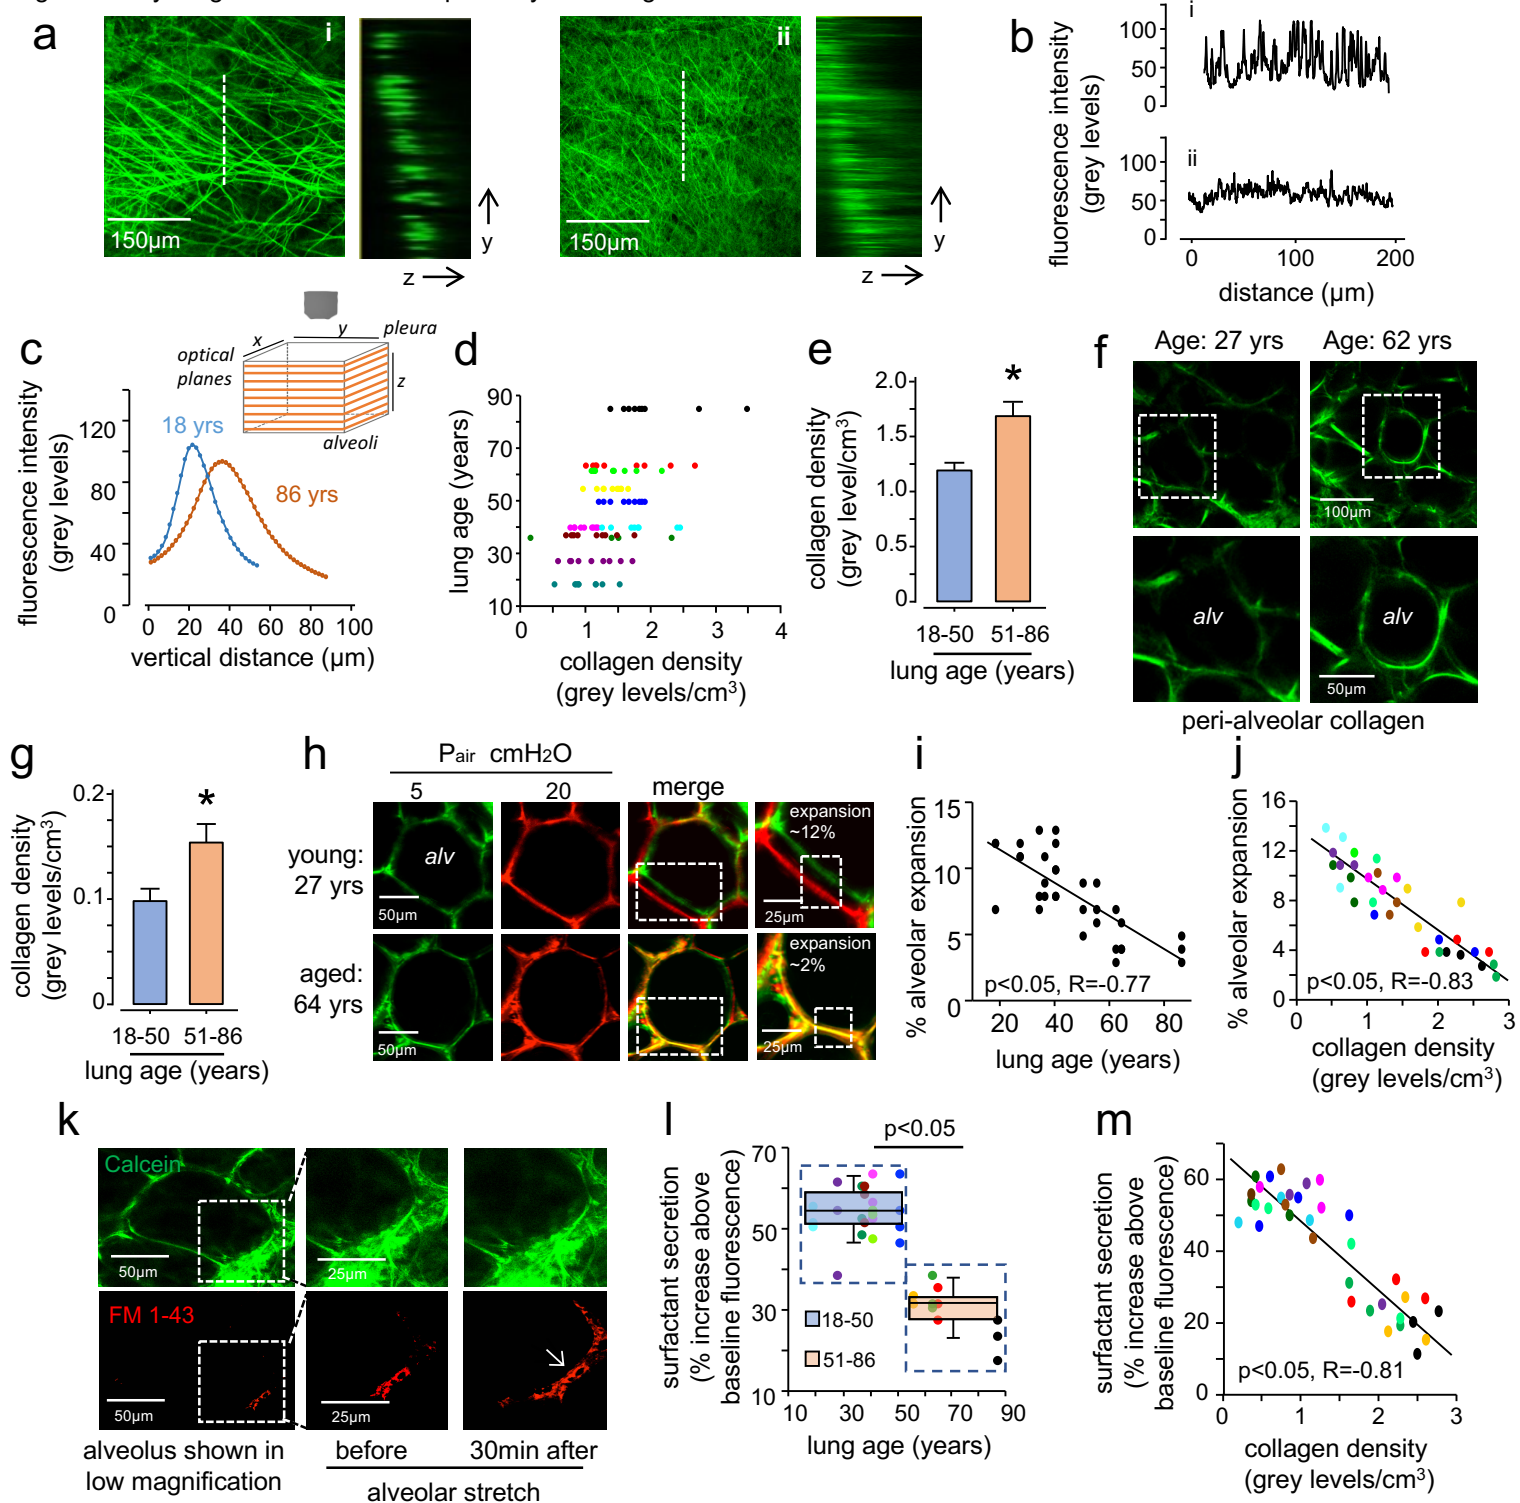

Source: https://www.biorxiv.org/content/biorxiv/early/2021/01/19/2021.01.18.427195.full.pdf
